# Supplementary material for: Efficient n-i-p Monolithic Perovskite/Silicon Tandem Solar Cells with Tin Oxide via a Chemical Bath Deposition Method
Source: MDPI journal article supplement (doi:10.3390/en14227614), 2021-11-15
Supplement: s1 [file s1]

Supplementary File

# Efficient n-i-p Monolithic Perovskite/Silicon Tandem Solar Cells with Tin Oxide via a Chemical Bath Deposition Method

Jiyeon Hyun <sup>1</sup>, Kyung Mun Yeom <sup>2</sup>, Ha Eun Lee <sup>1</sup>, Donghwan Kim <sup>1</sup>, Hae-Seok Lee <sup>3</sup>, Jun Hong Noh <sup>2,\*</sup> and Yoonmook Kang <sup>3,\*</sup>

<sup>1</sup> Department of Materials Science and Engineering, Korea University, 145, Anam-ro, Seongbuk-gu, Seoul 02841, Korea; hjy1214@korea.ac.kr (J.H.); sylvia0121@korea.ac.kr (H.E.L.); donghwan@korea.ac.kr (D.K.)

<sup>2</sup> School of Civil, Environmental and Architectural Engineering, Korea University, 145, Anam-ro, Seongbuk-gu, Seoul 02841, Korea; ykm911215@korea.ac.kr

<sup>3</sup> KU-KIST Green School Graduate School of Energy and Environment, Korea University, 145, Anam-ro, Seongbuk-gu, Seoul 02841, Korea; lhseok@korea.ac.kr

\* Correspondence: junhnoh@korea.ac.kr (J.H.N.); ddang@korea.ac.kr (Y.K.)

**Citation:** Hyun, J.; Yeom, K.M.; Lee, H.E.; Lee, H-S.; Kim, D.; Noh, J.H.; Kang, Y. Efficient n-i-p Monolithic Perovskite/Silicon Tandem Solar Cells with Tin Oxide via Chemical Bath Deposition method. *Energies* **2021**, *14*, 7614. <https://doi.org/10.3390/en14227614>

Academic Editor: Adalgisa Sinicropi

Received: 14 October 2021

Accepted: 10 November 2021

Published: 15 November 2021

**Publisher's Note:** MDPI stays neutral with regard to jurisdictional claims in published maps and institutional affiliations.

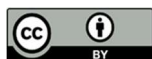

**Copyright:** © 2021 by the authors.

Licensee MDPI, Basel, Switzerland.

This article is an open access article distributed under the terms and conditions of the Creative Commons Attribution (CC BY) license (<https://creativecommons.org/licenses/by/4.0/>).

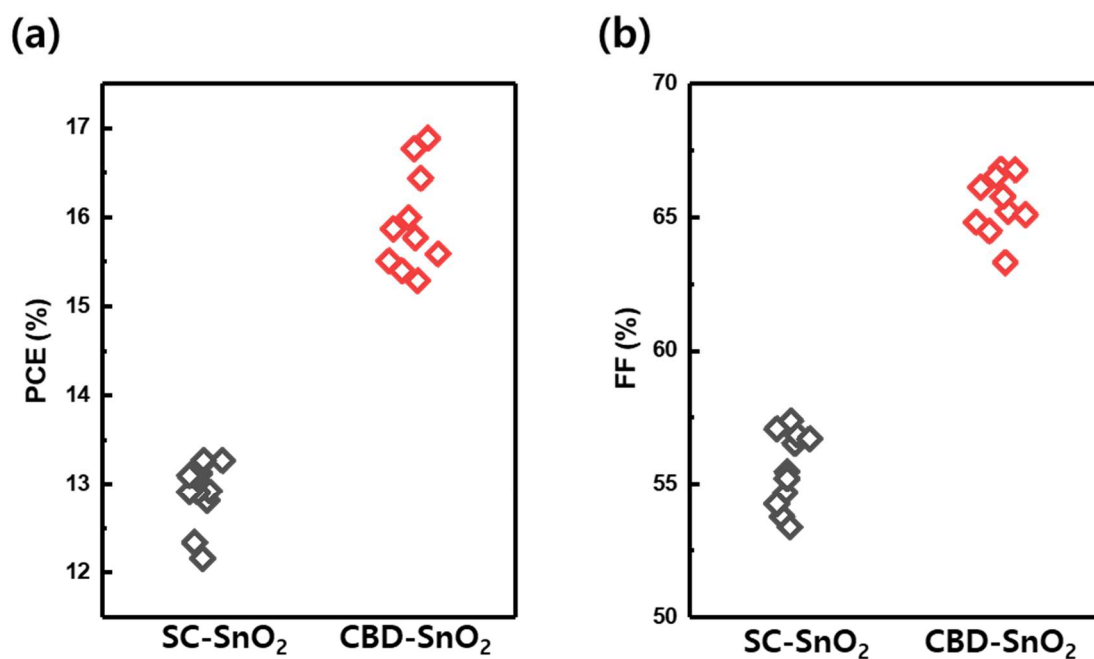

**Scheme S1.** Histogram of monolithic perovskite/silicon solar cells with an active area of 0.1 cm<sup>2</sup>, in which SnO<sub>2</sub> is fabricated by chemical bath deposition and spin-coating, respectively.
